# Supplementary material for: Degradable magnetic-response photoacoustic/up-conversion luminescence imaging-guided photodynamic/photothermal antitumor therapy
Source: Royal Society of Chemistry journal article supplement (doi:10.1039/c9bm00853e), 2019-01-01
Supplement: c9bm00853e1.pdf [file c9bm00853e1.pdf]

## Supporting Information

### **Degradable      magnetic-response      photoacoustic/up-conversion luminescence imaging-guided photodynamic/photothermal antitumor therapy**

Ruichan Lv,<sup>a,\*</sup> Xue Jiang,<sup>a</sup> Fan Yang,<sup>a</sup> Yanxing Wang,<sup>a</sup> Miao Feng,<sup>a</sup> Jun Liu,<sup>a</sup> and Jie Tian<sup>a,b,\*</sup>

*a. Engineering Research Center of Molecular and Neuro Imaging, Ministry of Education, School of Life Science and Technology, Xidian University, Xi'an, Shaanxi 710071, China*

*b. Key Laboratory of Molecular Imaging of Chinese Academy of Sciences, Institute of Automation, Chinese Academy of Sciences, Beijing 100190, China*

---

Corresponding author:

E-mail: [rclv@xidian.edu.cn](mailto:rclv@xidian.edu.cn) (R. Lv), [jie.tian@ia.ac.cn](mailto:jie.tian@ia.ac.cn) (J. Tian)

**Synthesis of  $\text{Fe}_3\text{O}_4@\text{mSiO}_2@\text{UCNPs}$  nanoparticles.** Ultra-small UCNPs were dissolved in PAA solution and stirred at room temperature for 12 h. After the reaction was finished, the supernatant was centrifuged and discarded. The precipitate was dissolved in water (10 mL).  $\text{Fe}_3\text{O}_4@\text{mSiO}_2$  (2 mg) was ultrasonically dispersed into the UCNPs solution, and then the mixed solution was shaken on a shaker for 12 h. After the reaction was completed, the magnetic nanoparticles were separated from the solution by a magnet, and washed three times with water. After drying in an oven at 60 °C for 12 h, the  $\text{Fe}_3\text{O}_4@\text{mSiO}_2@\text{UCNPs}$  composite materials were obtained.

**Synthesis of  $\text{Fe}_3\text{O}_4@\text{mSiO}_2@\text{UCNPs-FA}$ .** 1 mg of FA, 2 mg of NHS, and 6 mg of EDC were dissolved together in 20 mL of deionized water, and the prepared  $\text{Fe}_3\text{O}_4@\text{mSiO}_2@\text{UCNPs}$  was added to the mixture, and the solution was shaken overnight in the dark. Finally,  $\text{Fe}_3\text{O}_4@\text{mSiO}_2@\text{UCNPs-FA}$  was obtained by centrifugation and drying.

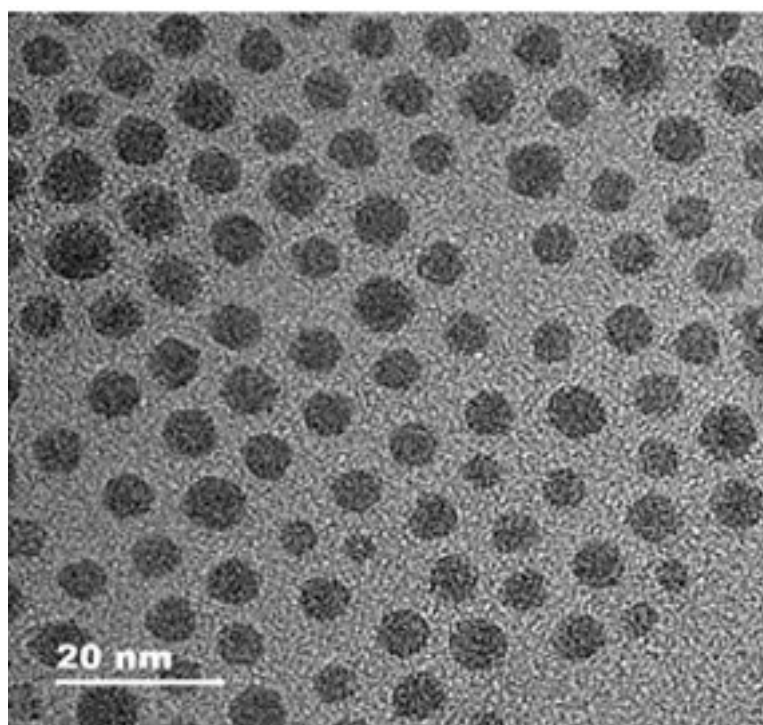

**Fig. S1.** TEM images ultra-small UCNPs.

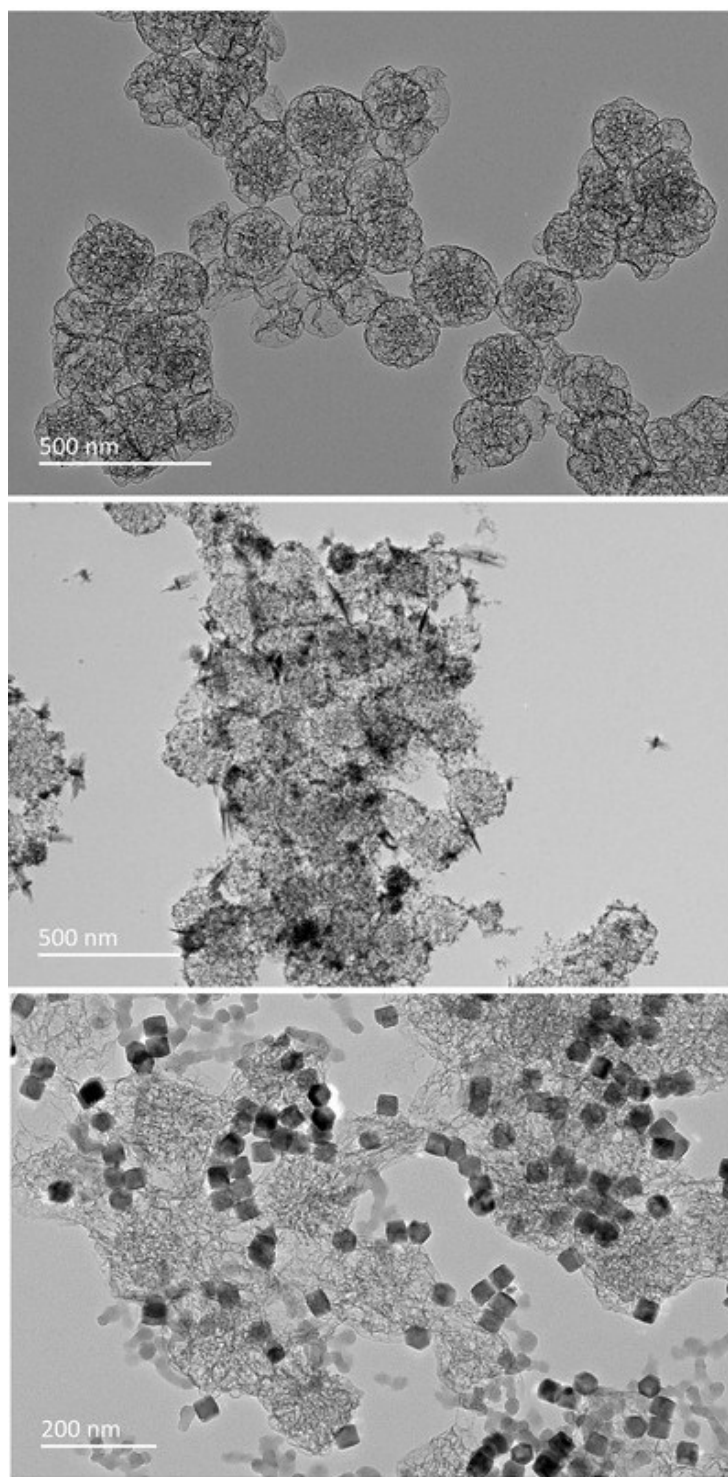

**Fig. S2.** TEM images of  $mSiO_2$ ,  $mSiO_2@Au$ , and  $mSiO_2@Au@UCNPs$ .

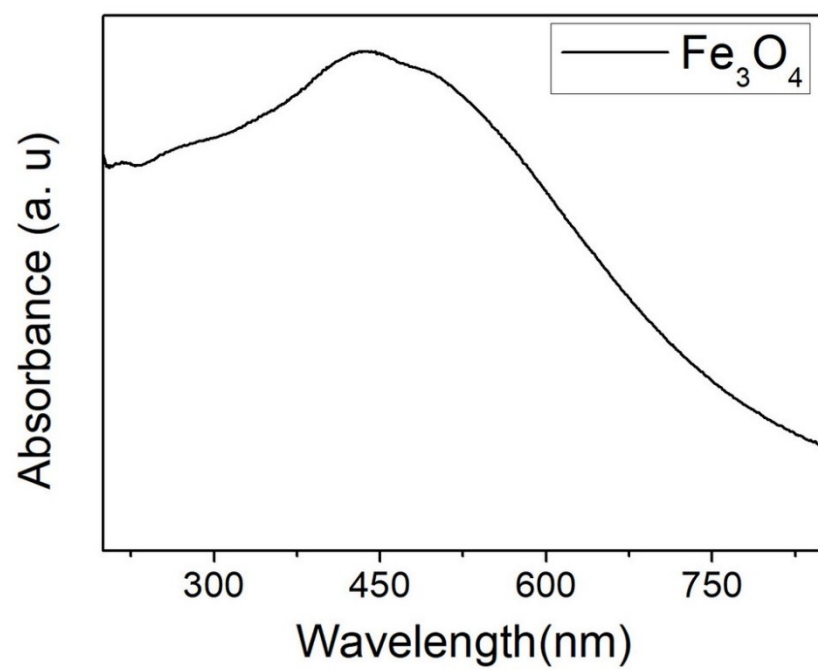

**Fig. S3.** The absorbance of  $\text{Fe}_3\text{O}_4@m\text{SiO}_2@\text{UCNPs}$  solution.

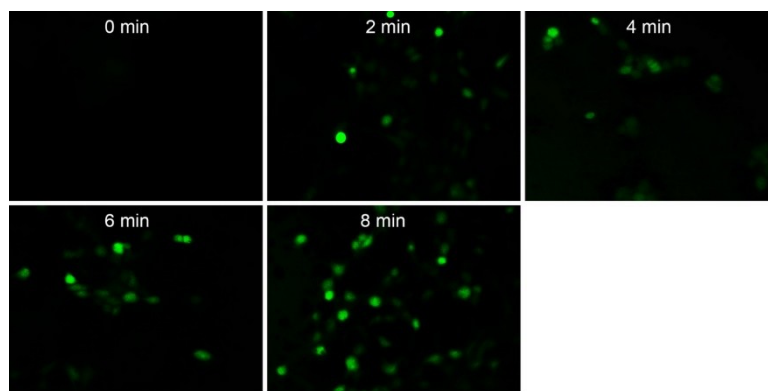

**Fig. S4.** The microscopy imaged of cells incubated with  $\text{Fe}_3\text{O}_4@\text{mSiO}_2@\text{UCNPs}$  and exposed to 808 nm laser. (The cells were marked by DCFH-DA).

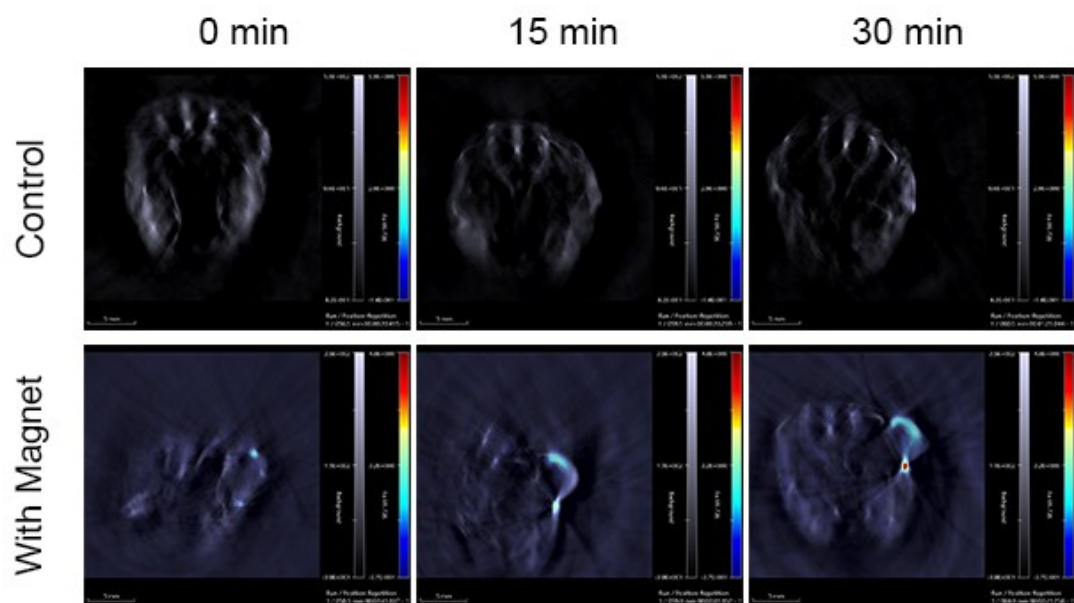

**Fig. S5.** Photoacoustic images of the tumor in the mice without treatment as the control group (up) and the mice after injected with  $\text{Fe}_3\text{O}_4@\text{mSiO}_2@\text{UCNPs}$  with magnet guided (down) for different time points.

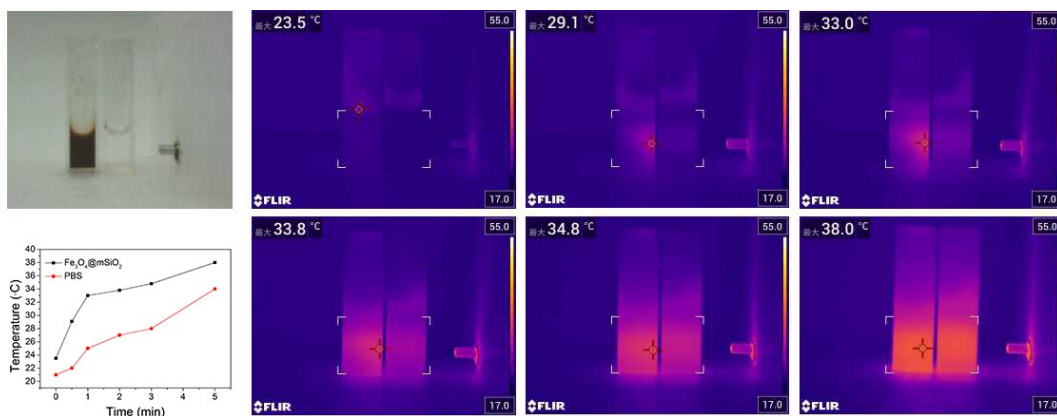

**Fig. S6.** Thermal imaging images of  $\text{Fe}_3\text{O}_4@\text{mSiO}_2$  and PBS at different time points (0min, 0.5 min, 1 min, 2 min, 3 min, and 5 min) under 980 nm laser irradiation.



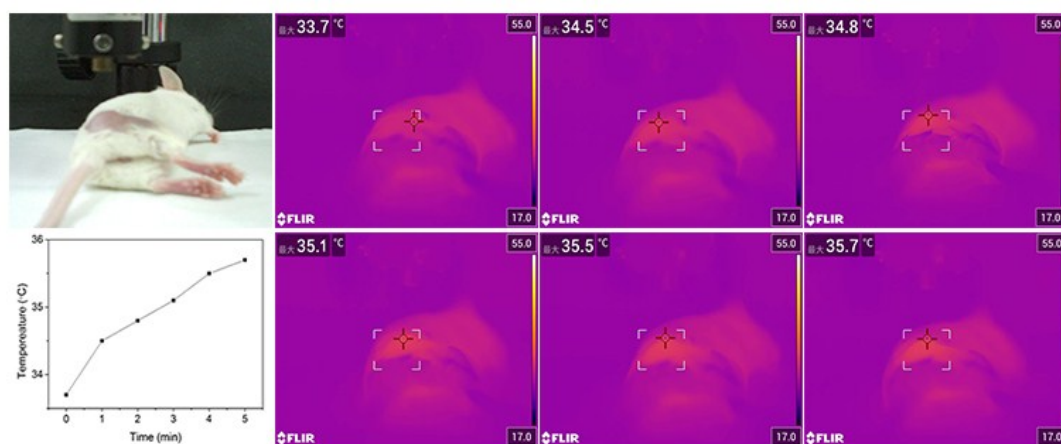

**Fig. S7.** Thermal imaging of Balb/c mouse injected subcutaneously with PBS under 808 nm laser irradiation.

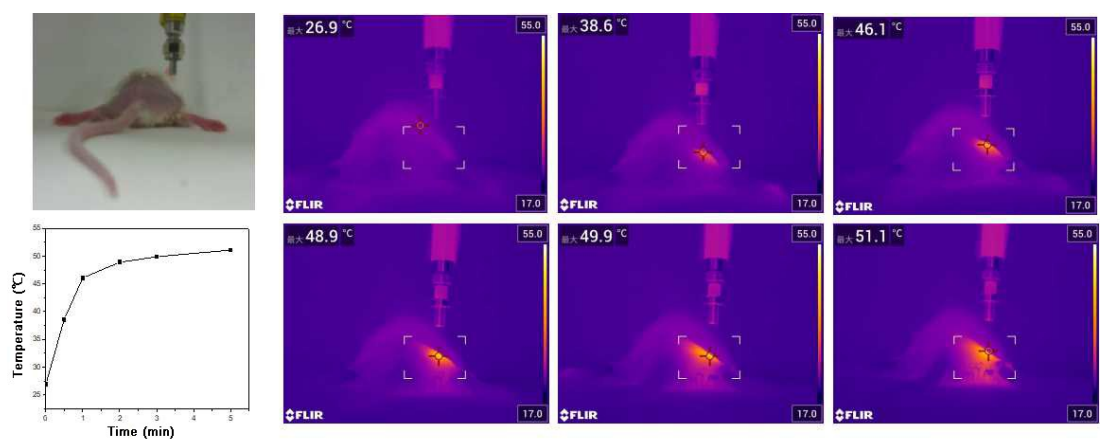

**Fig. S8.** Thermal imaging of Balb/c mouse injected subcutaneously with  $\text{Fe}_3\text{O}_4@\text{mSiO}_2$  under 980 nm laser irradiation.

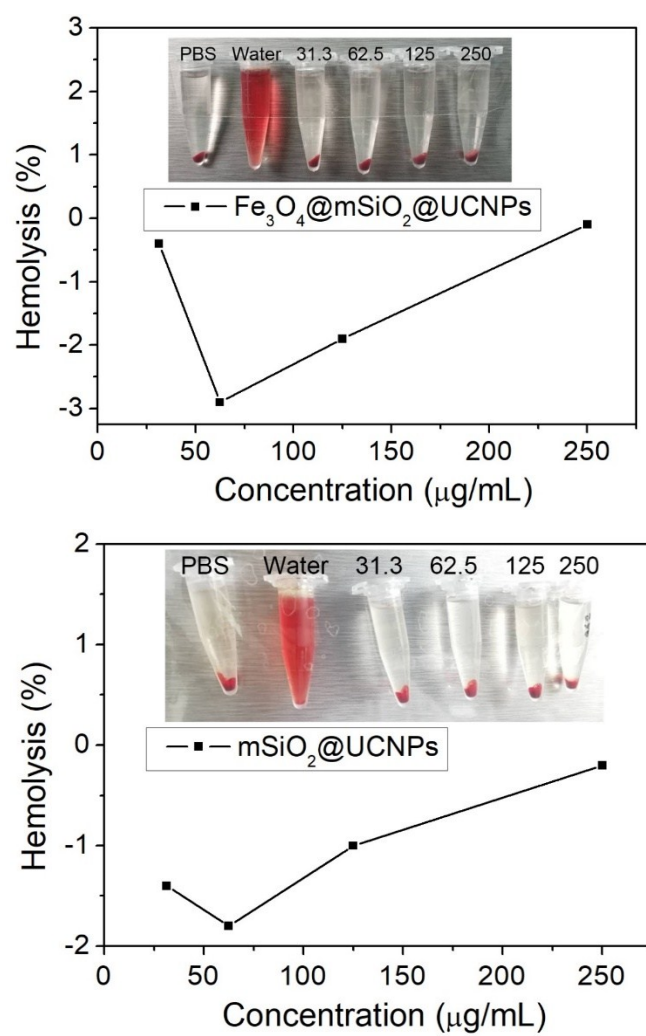

**Fig. S9.** Hemolysis results of  $\text{Fe}_3\text{O}_4@\text{mSiO}_2@\text{UCNPs}$  (up) and  $\text{mSiO}_2@\text{UCNPs}$  (down).

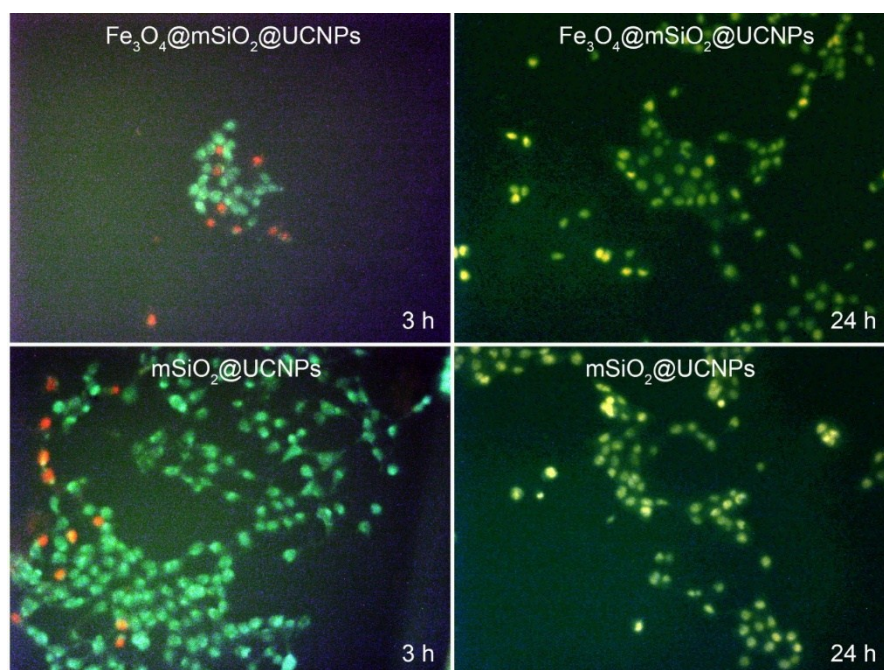

**Fig. S10.** The intracellular biocompatibility of SGC-7901 cells incubated with materials marked by Calcein AM/PI for different time points. Here, Calcein AM (green colour)/PI (red colour) are presented for live/dead state of cells, respectively.

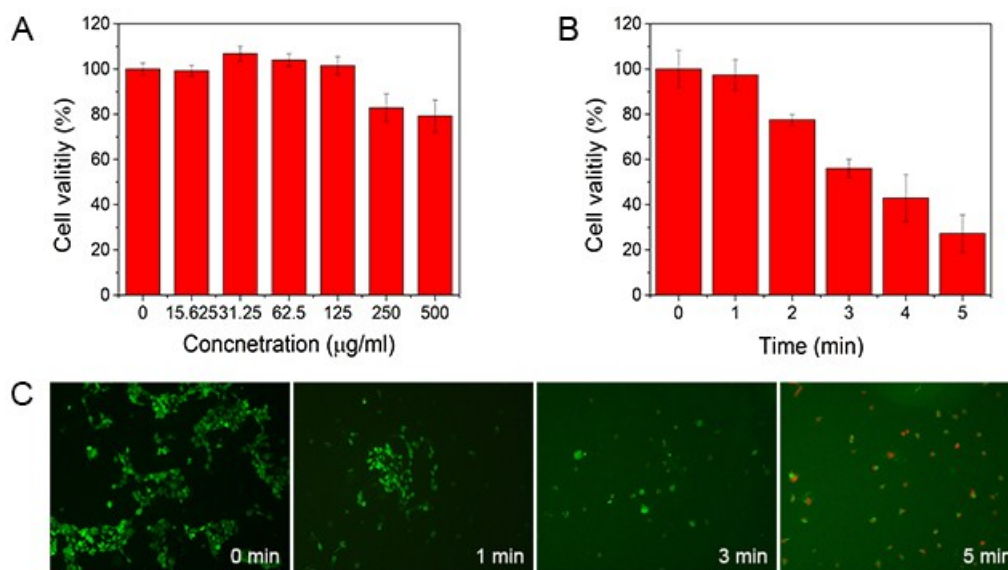

**Fig. S11.** (A) The viability of 4T1 cells incubated with  $\text{Fe}_3\text{O}_4@\text{mSiO}_2@\text{UCNPs}$  for different concentrations. (B) The viability of 4T1 cells incubated with  $\text{Fe}_3\text{O}_4@\text{mSiO}_2@\text{UCNPs}$  under 808 nm laser irradiation for different time points. (C) 4T1 cells incubated with  $\text{Fe}_3\text{O}_4@\text{mSiO}_2@\text{UCNPs}$  under 808 nm laser irradiation for different time points and marked with Calcein AM/PI. Here, Calcein AM (green colour)/PI (red colour) are presented for live/dead state of cells, respectively.

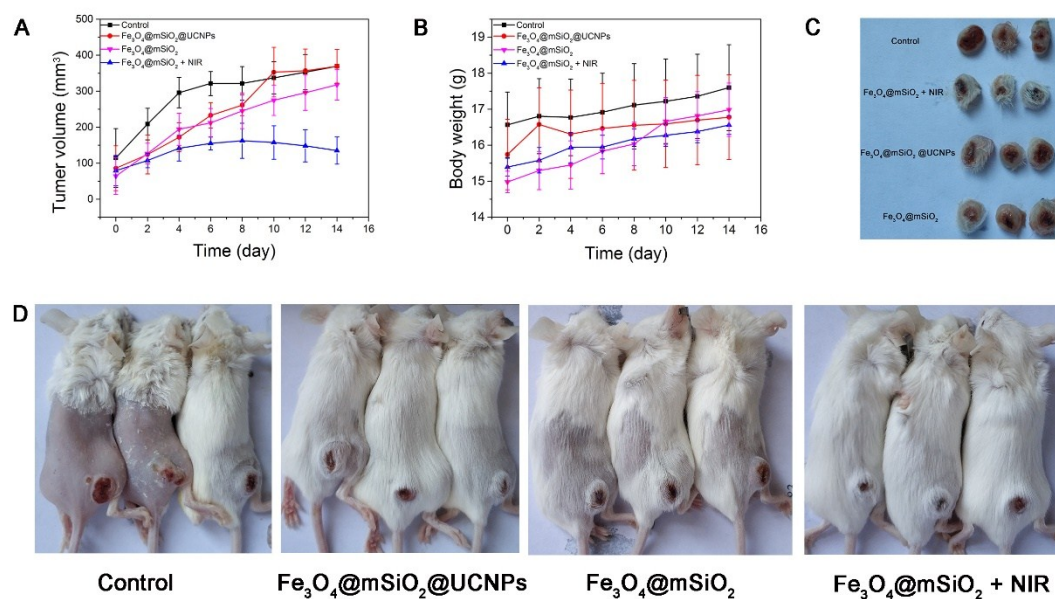

**Fig. S12.** *In vivo* therapy of more control groups. (A) Tumor size and (B) body weight of the mice treated with different control groups. The pictures of (C) tumors and (D) mice with tumor treated with different control groups.

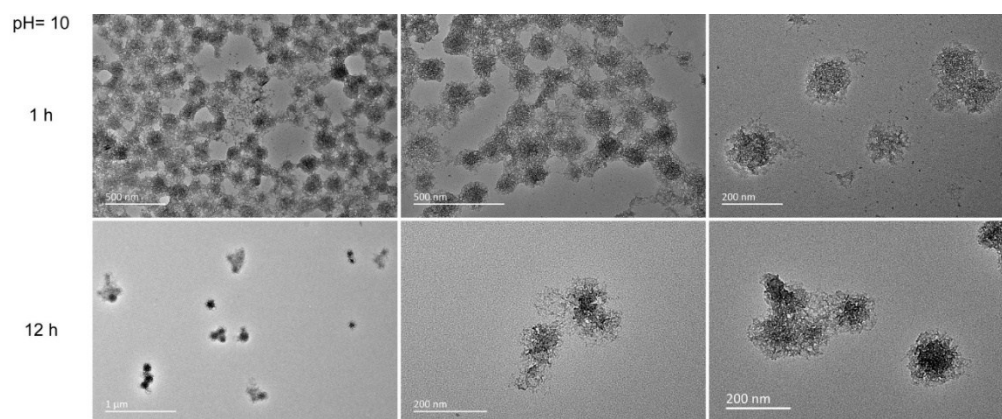

**Fig. S13.** TEM images of mSiO<sub>2</sub> in the diluted NaOH solution (pH = 10) for different degradable time points.

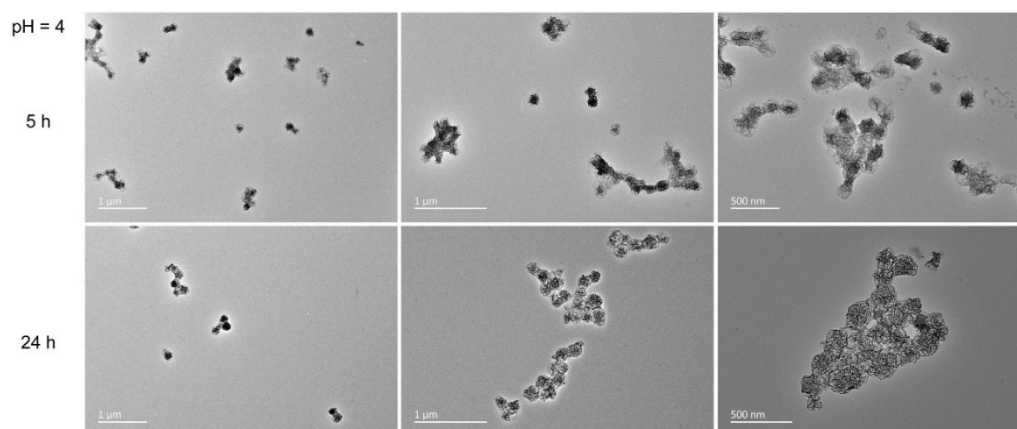

**Fig. S14.** TEM images of mSiO<sub>2</sub> in the diluted HCl solution (pH = 4) for different degradable time points.



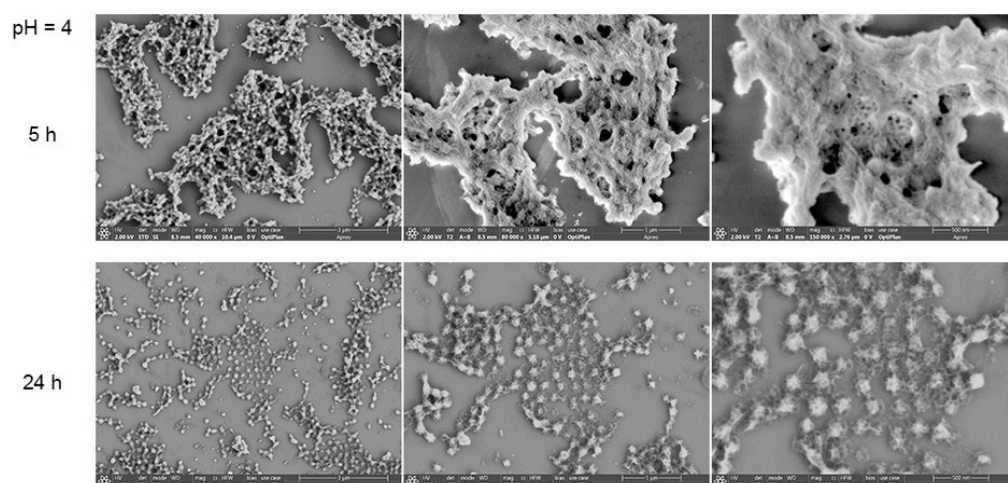

**Fig. S15.** SEM images of  $\text{mSiO}_2$  in the diluted HCl solution ( $\text{pH} = 4$ ) for different degradable time points.
